# Supplementary material for: A Novel Carotenoid-Producing Bacterium, Paenibacillus aurantius sp. nov., Isolated from Korean Marine Environment
Source: MDPI journal article supplement (doi:10.3390/microorganisms11112719), 2023-11-07
Supplement: s1 [file s1]

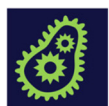

## Supplementary Material

# **A Novel Carotenoid-Producing Bacterium, *Paenibacillus aurantius* sp. nov., Isolated from Korean Marine Environment**

**Chi Young Hwang<sup>1,†</sup>, Sung Man Seo<sup>2,†</sup>, Eui-Sang Cho<sup>1</sup>, Young-Do Nam<sup>3</sup>, So-Lim Park<sup>3</sup>, Seong-Il Lim<sup>3,\*</sup>, and Myung-Ji Seo<sup>1,4,5,\*</sup>**

<sup>1</sup> Department of Bioengineering and Nano-Bioengineering, Incheon National University, Incheon 22012, Republic of Korea; hcyoung28@inu.ac.kr (C.Y.H.); whdmltkd123@gmail.com (E.-S.C.)

<sup>2</sup> Advanced Geo-materials Research Department, Pohang Branch, Korea Institute of Geoscience and Mineral Resources, Pohang 37559, Republic of Korea; smseo@kigam.re.kr (S.M.S.)

<sup>3</sup> Personalized Diet Research Group, Korea Food Research Institute, Wanju 55365, Republic of Korea; youngdo98@kfri.re.kr (Y.-D.N.); slpark@kfri.re.kr (S.-L.P.)

<sup>4</sup> Division of Bioengineering, Incheon National University, Incheon 22012, Republic of Korea

<sup>5</sup> Research Center for Bio Materials & Process Development, Incheon National University, Incheon 22012, Republic of Korea

\* Correspondence: silim@kfri.re.kr (S.-I.L.); mjseo@inu.ac.kr (M.-J.S.)

<sup>†</sup> These authors contributed equally to this work.

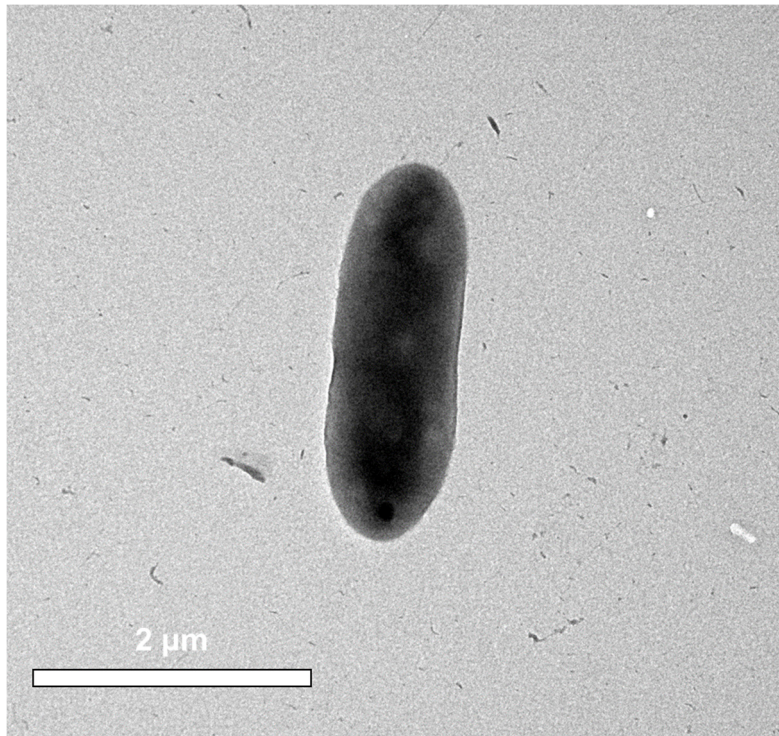

**Figure S1.** Negatively stained transmission electron micrograph of strain MBLB1776<sup>T</sup>. Strain MBLB1776<sup>T</sup> was cultivated at 30 °C for two days in R2A. Bar: 2 μm.

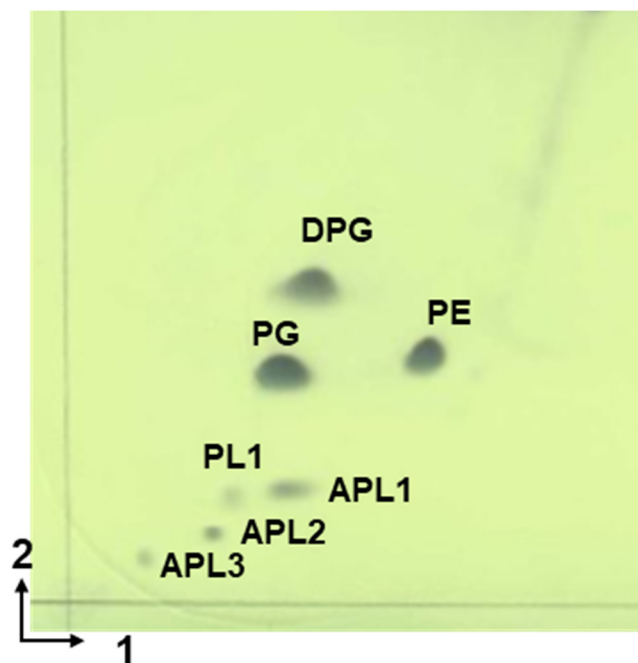

**Figure S2.** Thin-layer chromatograms of the polar lipids of strain MBLB1776<sup>T</sup>. The 1st-D developing agent, chloroform:methanol:water (65:25:4, v/v/v) and the 2nd-D agent, chloroform:acetic acid:methanol:water (80:15:12:4, v/v/v/v). Sulfuric acid-ethanol (1:2, v/v) solution was used for visualization of total lipids, Zinzade's reagent (5% of ethanolic molybdotophosphoric acid) - for total phospholipids, ninhydrin - for amino-containing lipids. The major polar lipids are DPG, PG, and PE. PL, unidentified phospholipid; APL, unidentified aminolipids;

**Table S1.** 16S rRNA gene similarities between *Paenibacillus aurantius* MBLB1776<sup>T</sup> and closely related species.

| Taxon                                                     | Accession no. | Similarity (%) |
|-----------------------------------------------------------|---------------|----------------|
| <i>Paenibacillus cavernae</i> C4-5 <sup>T</sup>           | LN852381      | 94.83          |
| <i>Paenibacillus contaminans</i> CKOBP-6 <sup>T</sup>     | EF626690      | 94.13          |
| <i>Paenibacillus elgii</i> SD17 <sup>T</sup>              | AY090110      | 93.78          |
| <i>Paenibacillus chinjuensis</i> WN9 <sup>T</sup>         | AF164345      | 93.65          |
| <i>Paenibacillus piri</i> MS74 <sup>T</sup>               | KY445675      | 93.62          |
| <i>Paenibacillus esterisolvans</i> CFH S0170 <sup>T</sup> | KP232905      | 93.51          |
| <i>Paenibacillus cookii</i> LMG 18419 <sup>T</sup>        | AJ250317      | 93.51          |
| <i>Paenibacillus puldeungensis</i> CAU 9324 <sup>T</sup>  | GU187433      | 93.37          |
| <i>Paenibacillus azoreducens</i> AJ272249 <sup>T</sup>    | AJ272249      | 93.32          |
| <i>Gorillibacterium massiliense</i> G5 <sup>T</sup>       | CBQR020000178 | 93.28          |
| <i>Paenibacillus cineris</i> LMG 18439 <sup>T</sup>       | AJ575658      | 93.24          |
| <i>Fontibacillus phaseoli</i> BAPVE7B <sup>T</sup>        | KF583881      | 93.23          |
| <i>Paenibacillus doosanensis</i> CAU 1055 <sup>T</sup>    | JX233493      | 93.21          |

**Table S2.** Description of the characteristics of novel species *Paenibacillus aurantius* MBLB1776<sup>T</sup> using the API 50CH.

|                 |                                                                                                                                                                                                                                                                                                                                                                                                                                                                                    |
|-----------------|------------------------------------------------------------------------------------------------------------------------------------------------------------------------------------------------------------------------------------------------------------------------------------------------------------------------------------------------------------------------------------------------------------------------------------------------------------------------------------|
| <b>Positive</b> | In the API 50CH test, methyl- $\beta$ -D-xyloside, D-galactose, D-glucose, D-fructose, D-mannose, methyl- $\alpha$ -D-glucoside, amygdalin, esculin, salicin, D-cellobiose, D-maltose, sucrose, D-trehalose, and D-raffinose are positive                                                                                                                                                                                                                                          |
| <b>Negative</b> | In the API 50 CH test, glycerol, erythritol, D-arabinose, L-arabinose, D-ribose, D-xylose, L-xylose, D-adonitol, L-sorbose, L-rhamnose, dulcitol, inositol, D-mannitol, D-sorbitol, methyl- $\alpha$ -D-mannoside, N-acetylglucosamine, arbutin, D-lactose, D-melibiose, inulin, D-melezitose, starch, glycogen, xylitol, gentiobiose, D-turanose, D-lyxose, D-tagatose, D-fucose, L-fucose, D-arabitol, L-arabitol, gluconate, 2-ketogluconate, and 5-ketogluconate are negative. |

**Table S3.** Differential cellular fatty acid contents of *Paenibacillus aurantius* MBLB1776<sup>T</sup> and other related species. Taxa: 1, Strain MBLB1776<sup>T</sup>; 2. *P. cavernae* C4-5<sup>T</sup>; 3. *P. contaminans* CKOBP-6<sup>T</sup>; 4. *P. doosanensis* CAU 1055<sup>T</sup>. All data are from this study under the same condition.

| Fatty acid                                                  | 1     | 2     | 3     | 4     |
|-------------------------------------------------------------|-------|-------|-------|-------|
| <b>Saturated</b>                                            |       |       |       |       |
| C <sub>12:0</sub>                                           | 0.22  | 1.12  | 0.51  | 1.83  |
| C <sub>14:0</sub>                                           | 1.42  | 2.29  | 3.10  | 1.89  |
| C <sub>16:0</sub>                                           | 6.06  | 2.80  | 11.82 | 10.56 |
| C <sub>17:0</sub>                                           | 0.49  | ND    | 0.74  | ND    |
| C <sub>18:0</sub>                                           | 0.28  | ND    | 0.77  | 0.83  |
| <b>Unsaturated</b>                                          |       |       |       |       |
| C <sub>15:1</sub> ω5c                                       | ND    | 2.30  | ND    | ND    |
| C <sub>16:1</sub> ω7c alcohol                               | 2.26  | ND    | ND    | 1.88  |
| C <sub>16:1</sub> ω11c                                      | 3.72  | ND    | 0.65  | 4.24  |
| C <sub>17:1</sub> ω9c                                       | 0.21  | ND    | ND    | ND    |
| C <sub>18:1</sub> ω9c                                       | 0.85  | 4.61  | 1.87  | 4.40  |
| C <sub>20:1</sub> ω9c                                       | ND    | ND    | ND    | ND    |
| C <sub>20:4</sub> ω6,9,12,15c                               | ND    | ND    | 0.67  | 0.53  |
| <b>Branched-chain fatty acid</b>                            |       |       |       |       |
| C <sub>14:0</sub> iso                                       | 4.05  | 4.02  | 2.39  | 3.02  |
| C <sub>15:0</sub> iso                                       | 5.95  | 26.85 | 2.53  | 3.61  |
| C <sub>16:0</sub> iso                                       | 10.10 | 3.45  | 8.89  | 14.28 |
| C <sub>17:0</sub> iso                                       | 1.05  | 1.15  | 0.72  | 1.21  |
| C <sub>17:1</sub> iso ω10c                                  | 0.51  | ND    | ND    | 0.56  |
| C <sub>11:0</sub> anteiso                                   | 0.34  | ND    | ND    | ND    |
| C <sub>13:0</sub> anteiso                                   | 1.64  | 1.48  | 1.01  | 1.49  |
| C <sub>15:0</sub> anteiso                                   | 56.28 | 43.92 | 58.71 | 42.15 |
| C <sub>17:0</sub> anteiso                                   | 3.14  | 6.03  | 5.04  | 5.58  |
| C <sub>17:1</sub> anteiso ω9c                               | 0.19  | ND    | ND    | 0.30  |
| <b>Summed feature</b>                                       |       |       |       |       |
| <b>3;</b> C <sub>16:1</sub> ω7c/C <sub>16:1</sub> ω6c       | 0.18  | ND    | 0.57  | 0.57  |
| <b>4;</b> C <sub>17:1</sub> iso I/C <sub>17:1</sub> anteiso | 1.06  | ND    | ND    | 0.77  |
| <b>8;</b> C <sub>18:1</sub> ω7c/C <sub>18:1</sub> ω6c       | ND    | ND    | ND    | 0.33  |

**Table S4.** Subsystem category distribution in *Paenibacillus aurantius* MBLB1776<sup>T</sup> genome

| Subsystem feature                                | Count       |
|--------------------------------------------------|-------------|
| Cofactors, vitamins, prosthetic groups, pigments | 130         |
| Cell wall and capsule                            | 71          |
| Virulence, disease and defense                   | 59          |
| Potassium metabolism                             | 3           |
| Miscellaneous                                    | 20          |
| Membrane transport                               | 29          |
| Iron acquisition and metabolism                  | 15          |
| RNA metabolism                                   | 57          |
| Nucleosides and nucleotides                      | 88          |
| Protein metabolism                               | 200         |
| Cell division and cell cycle                     | 5           |
| Motility and chemotaxis                          | 6           |
| Regulation and cell signaling                    | 15          |
| Secondary metabolism                             | 9           |
| DNA metabolism                                   | 83          |
| Fatty acids, lipids, and isoprenoids             | 29          |
| Nitrogen metabolism                              | 6           |
| Dormancy and sporulation                         | 44          |
| Respiration                                      | 61          |
| Stress response                                  | 36          |
| Metabolism of aromatic compounds                 | 11          |
| Amino acids and derivatives                      | 254         |
| Sulfur metabolism                                | 28          |
| Phosphorus metabolism                            | 32          |
| Carbohydrates                                    | 253         |
| <b>Total</b>                                     | <b>1544</b> |

**Table S5.** COG categories of coding proteins in *Paenibacillus aurantius* MBLB1776<sup>T</sup>

genome

| Code         | Description                                                   | Count        | %             |
|--------------|---------------------------------------------------------------|--------------|---------------|
| J            | Translation, ribosomal structure, and biogenesis              | 178          | 3.43          |
| K            | Transcription                                                 | 445          | 8.58          |
| L            | Replication, recombination and repair                         | 175          | 3.37          |
| D            | Cell cycle control, cell division, chromosome partitioning    | 35           | 0.67          |
| V            | Defense mechanisms                                            | 86           | 1.66          |
| T            | Signal transduction mechanisms                                | 294          | 5.67          |
| M            | Cell wall/membrane/envelope biogenesis                        | 228          | 4.39          |
| N            | Cell motility                                                 | 43           | 0.83          |
| U            | Intracellular trafficking, secretion, and vesicular transport | 40           | 0.77          |
| O            | Posttranslational modification, protein turnover, chaperones  | 105          | 2.02          |
| C            | Energy production and conversion                              | 177          | 3.41          |
| G            | Carbohydrate transport and metabolism                         | 637          | 12.28         |
| E            | Amino acid transport and metabolism                           | 289          | 5.57          |
| F            | Nucleotide transport and metabolism                           | 86           | 1.66          |
| H            | Coenzyme transport and metabolism                             | 116          | 2.24          |
| I            | Lipid transport and metabolism                                | 63           | 1.21          |
| P            | Inorganic ion transport and metabolism                        | 231          | 4.45          |
| Q            | Secondary metabolites biosynthesis, transport, and catabolism | 65           | 1.25          |
| B            | Chromatin structure and biogenesis                            | 2            | 0.04          |
| Z            | Cytoskeleton                                                  | 4            | 0.08          |
| A            | RNA processing and modification                               | 1            | 0.02          |
| S            | Function unknown                                              | 1,889        | 36.40         |
| <b>Total</b> |                                                               | <b>5,189</b> | <b>100.00</b> |
